# Supplementary material for: Moss-driven facilitation promotes species coexistence in Andean páramo peatlands
Source: Research Square preprint supplement (doi:10.21203/rs.3.rs-6743870/v1), 2025-05-30
Supplement: Supplementary file 1 [file 2dcfd33fd909af69414a1152.docx]

# Supplementary Table 2

Table 2. Standardised residuals and spatial associations of all species recorded during vegetation sampling. Residuals were calculated based on the number of observed and expected individuals under hummock and valley conditions. A standardised residual greater than 2 indicates a significant positive spatial association (in bold), while a value less than -2 indicates a negative association. The overall pattern in the peatland shows that all species present exhibit significant positive spatial associations with the hummock condition. In contrast, almost all display significant negative spatial associations with the valley condition, which is dominated by the continuous growth of *Sphagnum cuspidatum*.

| **Species** | **Hummock (Obs)** | **Hummock (Exp)** | **Valley (Obs)** | **Valley (Exp)** | **Total individuals** | **StaRes (H / V)** |
| --- | --- | --- | --- | --- | --- | --- |
| *Calamagrostis bogotensis* | 1114 | 323 | 179 | 970 | 1293 | **135** / -31.4 |
| *Pernettya prostrata* | 650 | 174 | 44 | 520 | 694 | **103.7** / -24.1 |
| *Puya cryptantha* | 311 | 108 | 121 | 324 | 432 | **54.5** / -12.7 |
| *Melpomene flabelliformis* | 427 | 107 | 0 | 320 | 427 | **86.4** / -20.1 |
| *Sphagnum magellanicum* | 357 | 96 | 27 | 288 | 384 | **73.9** / -17.2 |
| *Rhynchospora ruiziana* | 114 | 56 | 110 | 168 | 224 | **21.2** / -4.9 |
| *Poa sp1* | 151 | 49 | 44 | 146 | 195 | **39.9** / -9.3 |
| *Geranium lainzii* | 193 | 48 | 0 | 145 | 193 | **56.8** / -13.2 |
| *Chusquea tessellata* | 122 | 41 | 42 | 123 | 164 | **34.4** / -8 |
| *Breutelia squarrosa* | 145 | 40 | 15 | 120 | 160 | **45.1** / -10.5 |
| *Kurzia capillaris* | 113 | 37 | 33 | 109 | 146 | **34.3** / -8 |
| *Sphagnum cuspidatum* | 60 | 28 | 50 | 82 | 110 | **16.7** / -3.9 |
| *Frullania convoluta* | 97 | 24 | 0 | 73 | 97 | **39.9** / -9.3 |
| *Vaccinium floribundum* | 78 | 22 | 9 | 65 | 87 | **32.5** / -7.6 |
| *Pleurozium schreberi* | 79 | 20 | 2 | 61 | 81 | **35.2** / -8.2 |
| *Carex pichinchensis* | 30 | 17 | 36 | 49 | 66 | **8.9** / -2.1 |
| *Plagiochila bifaria* | 54 | 14 | 0 | 40 | 54 | **29.6** / -6.9 |
| *Pentacalia flosfragans* | 43 | 12 | 4 | 35 | 47 | **24.5** / -5.7 |
| *Gentianella corymbosa* | 37 | 11 | 8 | 34 | 45 | **20.6** / -4.8 |
| *Campylopus bryotropii* | 43 | 11 | 1 | 33 | 44 | **25.9** / -6 |
| *Nertera granadensis* | 31 | 9 | 4 | 26 | 35 | **20.2** / -4.7 |
| *Syzygiella rubricaulis* | 34 | 9 | 0 | 25 | 34 | **23.5** / -5.5 |
| *Calamagrostis effusa* | 22 | 6 | 2 | 18 | 24 | **17.5** / -4.1 |
| *Breutelia karsteniana* | 21 | 5 | 0 | 16 | 21 | **18.4** / -4.3 |
| *Fuscocephaloziopsis crassifolia* | 20 | 5 | 1 | 16 | 21 | **17.2** / -4 |
| *Hypotrachyna sp1* | 19 | 5 | 0 | 14 | 19 | **17.5** / -4.1 |
| *Usnea aff. fruticans* | 19 | 5 | 0 | 14 | 19 | **17.5** / -4.1 |
| *Herbertus sendtneri* | 16 | 4 | 0 | 12 | 16 | **16.1** / -3.7 |
| *Paepalanthus pilosus* | 15 | 4 | 0 | 11 | 15 | **15.6** / -3.6 |
| *Neobarzia laniflora* | 15 | 4 | 0 | 11 | 15 | **15.6** / -3.6 |
| *M147a* | 12 | 4 | 3 | 11 | 15 | **11.4** / -2.7 |
| *Blechnum loxense* | 14 | 4 | 0 | 10 | 14 | **15** / -3.5 |
| *Poaceae sp1* | 13 | 4 | 1 | 10 | 14 | **13.6** / -3.2 |
| *Bazzania longistipula* | 14 | 4 | 0 | 10 | 14 | **15** / -3.5 |
| *Arcytophyllum muticum* | 11 | 3 | 2 | 10 | 13 | **11.5** / -2.7 |
| *Paepalanthus karstenii* | 10 | 3 | 3 | 10 | 13 | **10** / -2.3 |
| *Oreobolus goeppingeri* | 10 | 3 | 1 | 8 | 11 | **11.7** / -2.7 |
| *Cora arachnoidea* | 11 | 3 | 0 | 8 | 11 | **13.3** / -3.1 |
| *Espeletia grandiflora* | 6 | 2 | 2 | 6 | 8 | **7.6** / -1.8 |
| *M148* | 8 | 2 | 0 | 6 | 8 | **11.4** / -2.6 |
| *Alobiellopsis dominicensis* | 7 | 2 | 0 | 5 | 7 | **10.6** / -2.5 |
| *M152* | 7 | 2 | 0 | 5 | 7 | **10.6** / -2.5 |
| *M153* | 6 | 2 | 1 | 5 | 7 | **8.6** / -2 |
| Other vascular plants (n = 13) | 34 | 2 | 3 | 4 | 37 | **17.3** / -4.8 |
| Other non-vascular plants (n = 9) | 25 | 2 | 2 | 4 | 27 | **14.9** / -4.1 |
| **Total** | 4618 | 1330 | 750 | 3986 | 5368 |  |

**Legend:** Legend: Standardized residuals (StaRes), number of observed individuals (Obs), number of expected individuals (Exp), Hummock (H), and Valley (V). Values in bold indicate a significant positive association (StaRes > 2); values < –2 indicate a negative association.
