# Supplementary material for: Moss-driven facilitation promotes species coexistence in Andean páramo peatlands
Source: Research Square preprint supplement (doi:10.21203/rs.3.rs-6743870/v1), 2025-05-30
Supplement: Supplementary file 2 [file 43aa82921200e17df01173a5.docx]

# Supplementary Table 1

Table 1. Summary of the seven generalized linear models (GLMs) used to analyze vascular and nonvascular plant richness in high Andean peatland hummocks. This table presents the model formulas along with a brief description of the ecological rationale for each model's structure.

| **Model** | **Formula** | **Description** |
| --- | --- | --- |
| M0 (null) | ~ 1 | Intercept-only model (baseline) |
| M1 | ~ Nonvascular richness | Evaluates the facilitative role of nonvascular plants |
| M2 | ~ Nonvascular richness + Height + Area + Layers + Nutrients + RH range + Temp range | Additive effects of biotic and abiotic variables |
| M3 | ~ Height + Area + Layers + Nutrients + RH range + Temp range | Abiotic and structural effects only |
| M4 | ~ Nonvascular richness × (Height + Area + Layers + Nutrients + RH range + Temp range) | Interaction between nonvascular richness and environment |
| M5 | Nonvascular richness ~ Height + Area + Layers + Nutrients + RH range + Temp range | Abiotic/structural effects on nonvascular richness |
| M6 | Nonvascular richness ~ (Height × Area × Layers) + (Nutrients × RH range) + (Nutrients × Temp range) | Interaction effects of structure and environment on nonvascular richness |
